# Supplementary material for: Stem cell transplant for mantle cell lymphoma in Taiwan
Source: PubMed Central journal article supplement (PMC8983774; doi:10.1038/s41598-022-09539-5), 2022-04-05
Supplement: 41598_2022_9539_MOESM1_ESM.pdf [file 41598_2022_9539_MOESM1_ESM.pdf]

**Supplement Table 1. Infections encountered by MCL patients within 1 year post autologous stem cell transplant**

| Category                               | Number (%) | Time to infection |
|----------------------------------------|------------|-------------------|
| <b>Bacterial</b>                       |            |                   |
| Gram positive cocci                    | 5 (10.9)   | 11 (3-164)        |
| Gram negative bacilli                  | 7 (15.2)   | 4 (1-137)         |
| <b>Fungal</b>                          |            |                   |
| Oral candidiasis                       | 1 (2.2)    | 5                 |
| Candidemia                             | 1 (2.2)    | 4                 |
| Pulmonary fungal infection*            | 2 (4.3)    | 11 (8-14)         |
| <i>Pneumocystis jiroveci</i> Pneumonia | 1 (2.2)    | 154               |
| <b>Viral</b>                           |            |                   |
| Cytomegalovirus antigenemia            | 12 (26.1)  | 24 (11-126)       |
| Cytomegalovirus colitis†               | 2 (4.3)    | 45 (35-55)        |
| Herpes simplex virus                   | 5 (10.9)   | 9 (5-32)          |
| Varicella-zoster virus                 | 4 (8.7)    | 75 (19-178)       |
| Febrile neutropenia‡                   | 6 (13.0)   | 18 (1-97)         |

\*Probable, per the European Organization for Research and Treatment of Cancer criteria.

†With pathologic confirmation

‡Without definite culture result

**Supplement Figure 1. Progression-free survival (PFS) and overall survival (OS) of patients who received transplantation before and after 2016.**

(a) Patients receiving transplantation after 2016 had better PFS than their counterparts.

(b) Patients receiving transplantation after 2016 had a trend of better OS than their counterparts.

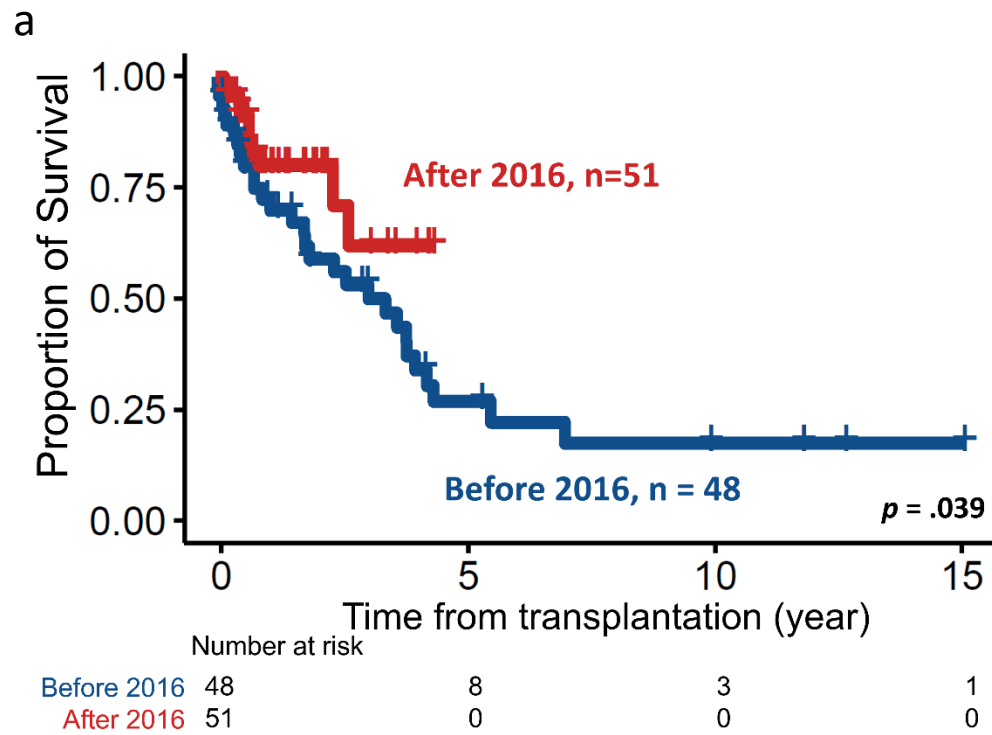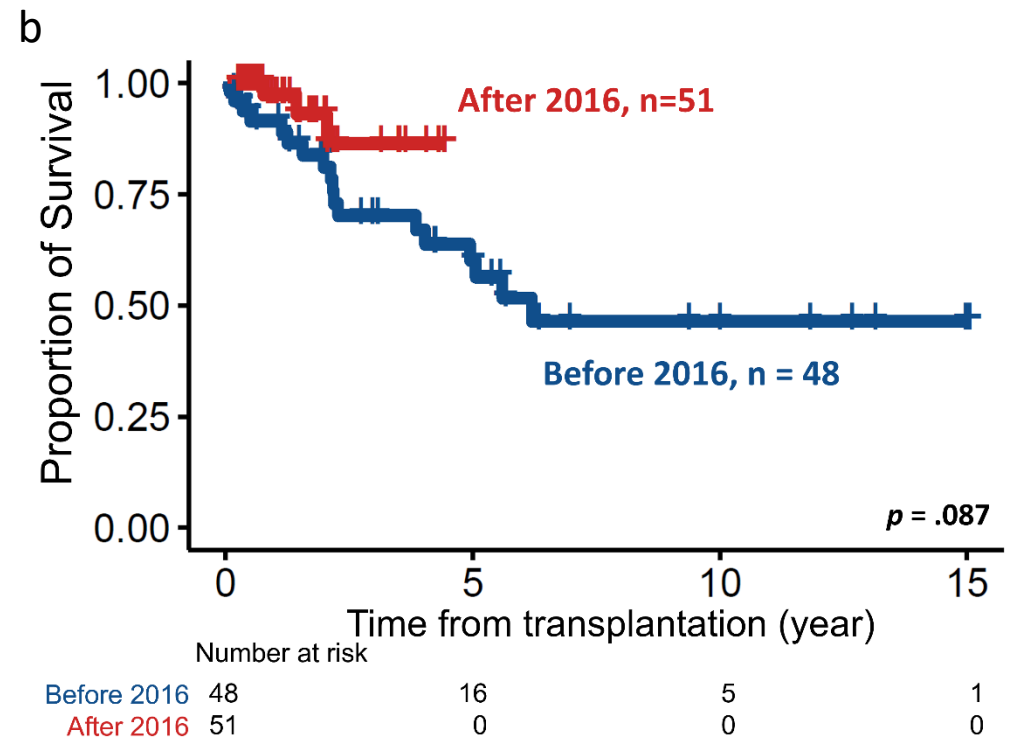

**Contributing centers that were registered with the TBMTR Data Center:**

Taipei Veterans General Hospital, National Taiwan University Hospital, Kaoshiung Medical University Hospital, China Medical University Hospital, Chang-Gung Memorial Hospital—Linko, Changhua Christian Hospital, Tri Service General Hospital, Koo Foundation Sun Yat-Sen Cancer Center, Hualien Tzu Chi Hospital-Buddhist Tzu Chi Medical Foundation, Chang-Gung Memorial Hospital—Chiayi, Chia-Yi Christian Hospital, National Cheng Kung University Hospital, Taichung Veterans General Hospital, Chi-Mei General Hospital, Kaoshiung Veterans General Hospital, Chang-Gung Memorial Hospital—Kaohsiung, Far Eastern Memorial Hospital
